# Supplementary material for: Accelerated hydrogen evolution reaction in Ni3P/MoP2/MoO2 tri-phase composites with rich crystalline interfaces and oxygen vacancies achieved by plasma assisted phosphorization
Source: Royal Society of Chemistry journal article supplement (doi:10.1039/d1ta08457g), 2021-01-01
Supplement: d1ta08457g1.pdf [file d1ta08457g1.pdf]

## Supporting Information

### **Accelerated hydrogen evolution reaction in Ni<sub>3</sub>P/MoP<sub>2</sub>/MoO<sub>2</sub> tri-phase composites with rich crystalline interface and oxygen vacancies achieved by a plasma assisted phosphorization**

Baoan Zhang,<sup>a</sup> Zhongqing Jiang,<sup>a\*</sup> Xiaonan Shang,<sup>a</sup> Shasha Li,<sup>c</sup> and Zhong-Jie Jiang<sup>b\*</sup>

<sup>a</sup> Key Laboratory of Optical Field Manipulation of Zhejiang Province, Department of Physics, Zhejiang Sci-Tech University, Hangzhou 310018, P. R. China.

<sup>b</sup> Guangdong Engineering and Technology Research Center for Surface Chemistry of Energy Materials & Guangzhou Key Laboratory for Surface Chemistry of Energy Materials, New Energy Research Institute, College of Environment and Energy, South China University of Technology, Guangzhou 510006, P. R. China.

<sup>c</sup> College of Chemical and Biological Engineering, Taiyuan University of Science and Technology, Taiyuan 030024, P. R. China.

#### **\*Corresponding authors**

**E-mail:** zhongqingjiang@hotmail.com or zhongqingjiang@zstu.edu.cn (Z. Jiang).

**E-mail:** eszjiang@scut.edu.cn (Z.-J. Jiang).

#### **This PDF file includes:**

**Experimental Section**

**Theoretical calculation details**

**Figures. S1 to S17**

**Tables S1-S4**

## 1. Experimental Section

### 1.1 Chemicals

Hydrochloric acid (HCl, AR, 36.0–38.0%), ethanol (C<sub>2</sub>H<sub>5</sub>OH, 99.7%), nickel(II) nitrate hexahydrate (Ni(NO<sub>3</sub>)<sub>2</sub>·6H<sub>2</sub>O, 98%, Sigma-Aldrich), Ammonium molybdate tetrahydrate ((NH<sub>4</sub>)<sub>6</sub>Mo<sub>7</sub>O<sub>24</sub>·4H<sub>2</sub>O, 98%, Sigma-Aldrich), sodium hypophosphite (NaH<sub>2</sub>PO<sub>2</sub>, 99.9%, Sigma-Aldrich), potassium hydroxide (KOH, ≥85.0%, Alfa Aesar), and Ni foam (thickness: 1.6 mm) were used as received. Ruthenium oxide (RuO<sub>2</sub>, 99.9%) and Iridium black (Ir, 99.95%) was purchased from Alfa Aesar. Pt/C (JM 40wt % Pt-C) was purchased from Shanghai Hesun Electric Co., Ltd. Deionized water through Millipore system (Milli-Q<sup>®</sup>) was used.

### 1.2 Synthesis of NiMoO<sub>4</sub> nanorod arrays on Ni foam

NiMoO<sub>4</sub> nanorods (NRs) were synthesized on nickel foam (NiMoO<sub>4</sub>/NF) through a hydrothermal method. Typically, a 2 × 5 cm<sup>2</sup> Ni foam was successively cleaned by HCl solution (4 M), ethanol, and deionized water under ultrasonication. The cleaned substrate was then placed into a Teflon-lined stainless steel autoclave (100 mL) containing a 50 mL homogenous solution of Ni(NO<sub>3</sub>)<sub>2</sub> (0.5 mmol) and (NH<sub>4</sub>)<sub>6</sub>Mo<sub>7</sub>O<sub>24</sub> (0.5 mmol) and hydrothermally heated at 160 °C for 4 h. After cooling, the product was thoroughly rinsed with deionized water and ethanol for several times and dried at 60 °C overnight under vacuum. The dried sample was subsequently annealed in a muffle furnace at 300 °C under the air flow for 2 h.

### 1.3 Synthesis of P-NiMoP nanorod arrays on Ni foam (P-NiMoP/NF)

The P-NiMoP nanorods catalyst was synthesized by one-step phosphorization of the NiMoO<sub>4</sub>/NF synthesized above in a plasma enhanced chemical vapor deposition (PECVD) device equipped with a 13.56 MHz RF source. NaH<sub>2</sub>PO<sub>2</sub> was used as the P source and placed at the upstream of a tube furnace. A small piece of NiMoO<sub>4</sub>/NF (~ 1 cm<sup>2</sup>) was placed at the

middle of the tube furnace in a direction perpendicular to the nitrogen (N<sub>2</sub>) gas flow. The tube furnace was heated up to 550 °C with a temperature increase rate of 10 °C min<sup>-1</sup> under vacuum. Before the plasma discharge, the plasma reaction system was evacuated to 0.1 Pa. The nitrogen gas was then introduced with the pressure controlled to 20 Pa. Then the RF power supply was turned on and the plasma discharge power was set to 100 W. The temperature was kept at 550 °C and plasma discharge was continued for 90 min. After that, RF power supply was turned off. Also, the furnace was automatically turned off and naturally cooled down to room temperature under N<sub>2</sub> atmosphere. For the best performing sample, the mass of NaH<sub>2</sub>PO<sub>2</sub> powder was 1 g for ~ 1 cm<sup>2</sup> NiMoO<sub>4</sub> NRs on Ni foam.

For comparison, the T-NiMoP/NF was prepared by the conventional thermal phosphorization of the NiMoO<sub>4</sub> NRs in tube furnace at 550 °C without plasma discharge treatment under the same conditions.

#### **1.4 Materials characterization**

The morphology and crystal structure of the samples were characterized by scanning electron microscopy (SEM, Hitachi S-4800) coupled with energy dispersive X-ray (EDX) spectroscopy and transmission electron microscope (TEM, JEM-2100). The XRD patterns of the samples were obtained on an X-ray diffractometer (XRD, Bruker D8 Discover with a Cu K $\alpha$  radiation at 40 KV and 40 mA). The electron paramagnetic resonance (EPR) spectra were recorded using a JES-FA200 spectrometer. X-ray photoelectron spectroscopic (XPS) measurements were performed with a Thermo Fischer ESCALAB 250Xi spectrophotometer. The Ni, Mo and P contents in the P-NiMoP and T-NiMoP nanorods were measured by a Thermo Scientific ICAP Q inductively coupled plasma mass spectrometer (ICP-MS) instrumentation. Optical emission spectra (OES) were collected on a handheld spectrometer (Ocean Optics Corporation, USA) with a spectral resolution of 0.4 nm and a detectable spectral range of 200 to 1000 nm. The Raman measurements were performed using a

LabRAM HR Evolution spectroscope (HORIBA, France) and an argon ion laser (325 nm) was used as the excitation source.

### 1.5 Electrochemical Tests

All electrochemical tests were performed at room temperature on an electrochemical station (CHI 760E, CH Instruments Inc., Shanghai) in a standard three-electrode system. The prepared catalysts, a graphite electrode, and a saturated calomel electrode were used as the working, the counter, and the reference electrodes, respectively. The 1.0 M KOH aqueous solution (pH = ~14) was used as the electrolyte. Before data collection, cyclic voltammetry (CV), scanned at 0.068-0.132 V vs. RHE at a scan rate of 50 mV s<sup>-1</sup>, was applied to electrochemically activate the catalysts and used for the evaluation of the electrochemical stability of the catalysts.

Linear sweep voltammetry (LSV) was performed in 1.0 M KOH solution at a sweep rate of 10 mV s<sup>-1</sup>. Tafel slopes were calculated based on the LSV curve by plotting overpotential (vs. the RHE) against log (current density). Electrochemical impedance spectra (EIS) were measured at an overpotential of 100 mV from 0.01 Hz to 100 KHz. All the measured potentials vs. the SCE were converted to RHE by the Nernst equation ( $E_{\text{RHE}} = E_{\text{SCE}} + 0.059 \text{ pH} + 0.242$ ). All the curves were reported with 80% iR compensation.

### 1.6 DFT calculations

The Vienna ab initio simulation package was employed for the DFT calculations, in which the project augmented wave method with the generalized gradient approximation in the form of Perdew-Burke-Ernzerhof was utilized to calculate the exchange-correlation interactions. The plane-wave cutoff energy of 450 eV was set. The energy and force convergence criterion were set to 10<sup>-5</sup> eV and -0.01 eV Å<sup>-1</sup>, respectively. A vacuum layer of 15 Å was chosen for the slab to eliminate the interaction between neighboring structures in the c axis. So, the dipole correction and Van der Waals correction method was not used in the calculation. The climbing image nudged elastic band (CI-NEB) method was employed to S4

calculate the minimum energy for H<sub>2</sub>O dissociation. The Gibbs free energy of hydrogen adsorption ( $\Delta G_{H^*}$ ) on a surface is calculated by:

$$\Delta G_{H^*} = \Delta E_{H^*} + \Delta E_{ZPE} - T\Delta S \quad (S1)$$

where  $\Delta E_{H^*}$  is the adsorption energy of hydrogen on the catalyst surface, and  $\Delta E_{ZPE}$  represents the zero point energy difference between the adsorbed state and the gas phase of hydrogen atom. The higher binding energy between MoP<sub>2</sub>/Ni<sub>3</sub>P and MoO<sub>2</sub> or MoO<sub>2\_def</sub> is calculated.

### 1.7 The electrochemical active surface areas (EASAs)

The electrochemical active surface areas (EASAs) were estimated based on the electrochemical double-layer capacitance (EDLC). Generally, for a standard flat surface with a geometric surface area of 1 cm<sup>2</sup>, the EDLC was usually at 0.02-0.06 mF cm<sup>-2</sup>. It is worth noting that using nickel foam as a support has a much larger capacitance value than a flat surface as shown in **Fig. S7d**. Therefore, here Ni foam was considered as the standard. The EASA of each catalyst could be calculated according to the following formula:

$$A_{EASA} = \frac{C_{dl} - catalyst (mF cm^{-2})}{C_{dl} - Ni foam (mF cm^{-2}) per EASA cm^2} \quad (S2)$$

Taking the P-NiMoP as an example, in the hydrogen evolution reaction, its  $A_{EASA}$  could be calculated as:

$$A_{EASA}^{P-NiMoP} = \frac{60.21 mF cm^{-2}}{0.65 mF cm^{-2} per cm_{EASA}^2} = 92.63 cm_{EASA}^2 \quad (S3)$$

The calculated EASA was further used in the calculation of turnover frequency.

### 1.8 Turnover frequency (TOF) calculations

The TOF values were calculated according to the following formula:

$$TOF = \frac{\#total hydrogen turn overs / geometric area (cm^2)}{\#surface active sites / geometric area (cm^2)} \quad (S4)$$

The number of the total hydrogen turnovers can be calculated based on the current density (J, IR-corrected) according to:

$$\begin{aligned}
H_2 &= |J| \frac{mA}{cm^2} \cdot \frac{1 C s^{-1}}{1000 mA} \cdot \frac{1 mol e^-}{96495.3 C} \cdot \frac{1 mol H_2}{2 mol e^-} \cdot \frac{6.022 \times 10^{23} H_2 \text{ molecules}}{1 mol H_2} \\
&= 3.12 \times 10^{15} \frac{H_2 s^{-1}}{cm^2} \text{ per } \frac{mA}{cm^2}
\end{aligned} \tag{S5}$$

Note that the nature of the surface active sites is not yet understood and the exact number of hydrogen binding sites is not known, we estimated the number of the active sites based on the average atomic densities of atoms at the MoP<sub>2</sub> (131), Ni<sub>3</sub>P (231) and MoO<sub>2</sub> (-111) facets due to the difficulty in obtaining the exact numbers of active sites.

Specifically, the surface active sites per real surface area can be calculated as following (see **Fig. S16** below for the crystal structure):

Ni<sub>3</sub>P(231): real surface area, A= 13.369304×12.505229 nm<sup>2</sup>sin(75.62611°), contains 14 Ni and 4 P, 18 atoms.

$$\begin{aligned}
\#Surface \ sites(Ni_3P(231)) &= \frac{18 \text{ atoms per facet}}{13.369304 \times 12.505229 \text{ nm}^2 \sin(75.62611^\circ) \text{ per facet}} \\
&= 1.11 \times 10^{13} \text{ atoms / cm}^2 \text{ real surface area}
\end{aligned} \tag{S6}$$

MoP<sub>2</sub> (131): real surface area, A= 13.8233×11.8356 nm<sup>2</sup> sin(93.5809°), contains 8 Mo and 12 P, 20 atoms.

$$\begin{aligned}
\#Surface \ sites(MoP_2(131)) &= \frac{20 \text{ atoms per facet}}{13.8233 \times 11.8356 \text{ nm}^2 \sin(93.5809^\circ) \text{ per facet}} \\
&= 1.22 \times 10^{13} \text{ atoms / cm}^2 \text{ real surface area}
\end{aligned} \tag{S7}$$

MoO<sub>2</sub>(-111): real surface area, A= 5.640349×7.529668 nm<sup>2</sup> sin(112.78756°), contains 4 Mo and 4 O, 8 atoms.

$$\begin{aligned}
\#Surface \ sites(MoO_2(-111)) &= \frac{8 \text{ atoms per facet}}{5.640349 \times 7.529668 \text{ nm}^2 \sin(112.78756^\circ) \text{ per facet}} \\
&= 2.04 \times 10^{13} \text{ atoms / cm}^2 \text{ real surface area}
\end{aligned} \tag{S8}$$

Finally, the TOF can be calculated as:

$$TOF = \frac{3.12 \times 10^{15} \frac{H_2 s^{-1}}{cm^2} \text{ per } \frac{mA}{cm^2} \times |J|}{\# \text{ surface active sites} \times A_{EASA}} \quad (S9)$$

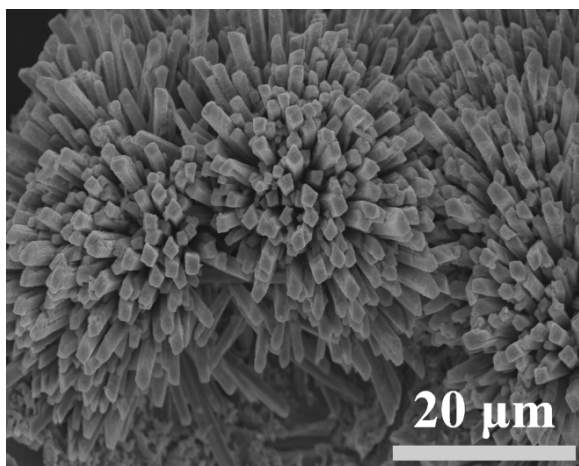

**Fig. S1** SEM image of NiMoO<sub>4</sub>/NF.

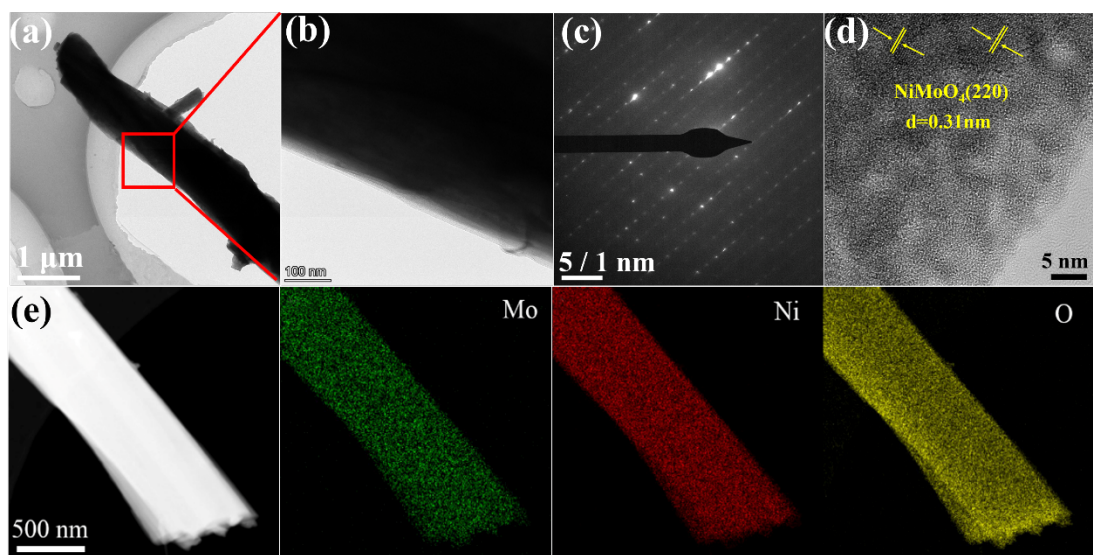

**Fig. S2** (a) TEM image, (b) magnified TEM image, (c) SAED pattern, (d) HRTEM image and (e) EDX elemental mapping images of NiMoO<sub>4</sub>. The energy dispersive X-ray (EDX) element mapping image shows that Ni, Mo and O elements are uniformly distributed in NiMoO<sub>4</sub> nanorods.

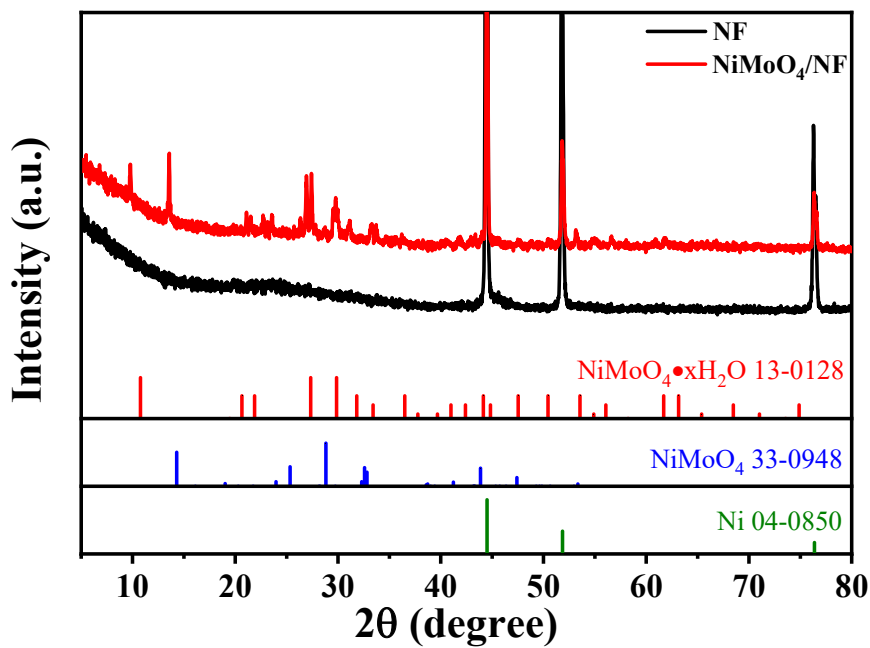

Fig. S3 XRD patterns of Ni foam and NiMoO<sub>4</sub>/NF.

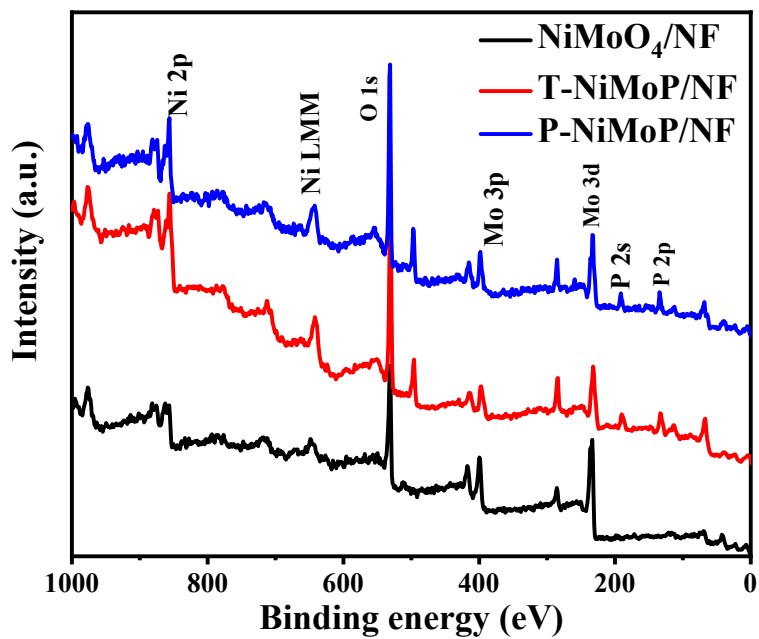

Fig. S4 XPS survey spectra of the NiMoO<sub>4</sub>/NF, T-NiMoP/NF and P-NiMoP/NF.



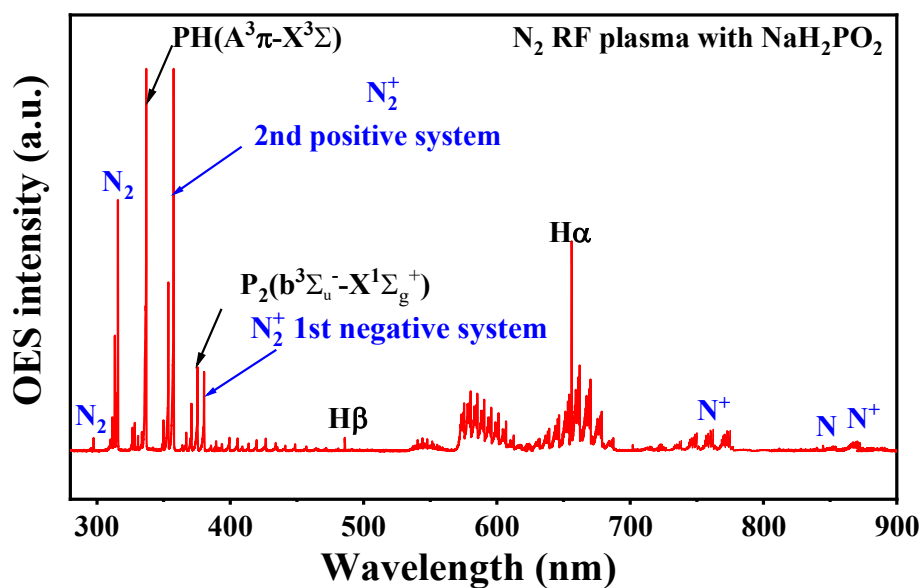

**Fig. S5** Optical emission spectra of  $N_2$  RF plasma with  $NaH_2PO_2$ . The key reactive species generated in the plasma are labelled. Plasma is essential to achieve efficient phosphorization under vacuum conditions. Optical emission spectroscopy (OES) is used to study the role of  $N_2$  RF plasma in the phosphorization process. In the  $N_2$  RF plasma state, there are a variety of active nitrogen including atomic nitrogen radicals and N ions ( $N$ ,  $N^+$ ,  $N_2$ ,  $N_2^+$ ). These highly reactive species will cause  $PH_3$  produced by the pyrolysis of  $NaH_2PO_2$  to react more violently with  $NiMoO_4$  nanorods, facilitating the formation of the P- $NiMoP$  NRs with rich crystalline interfaces and oxygen defects in  $MoO_2$ .

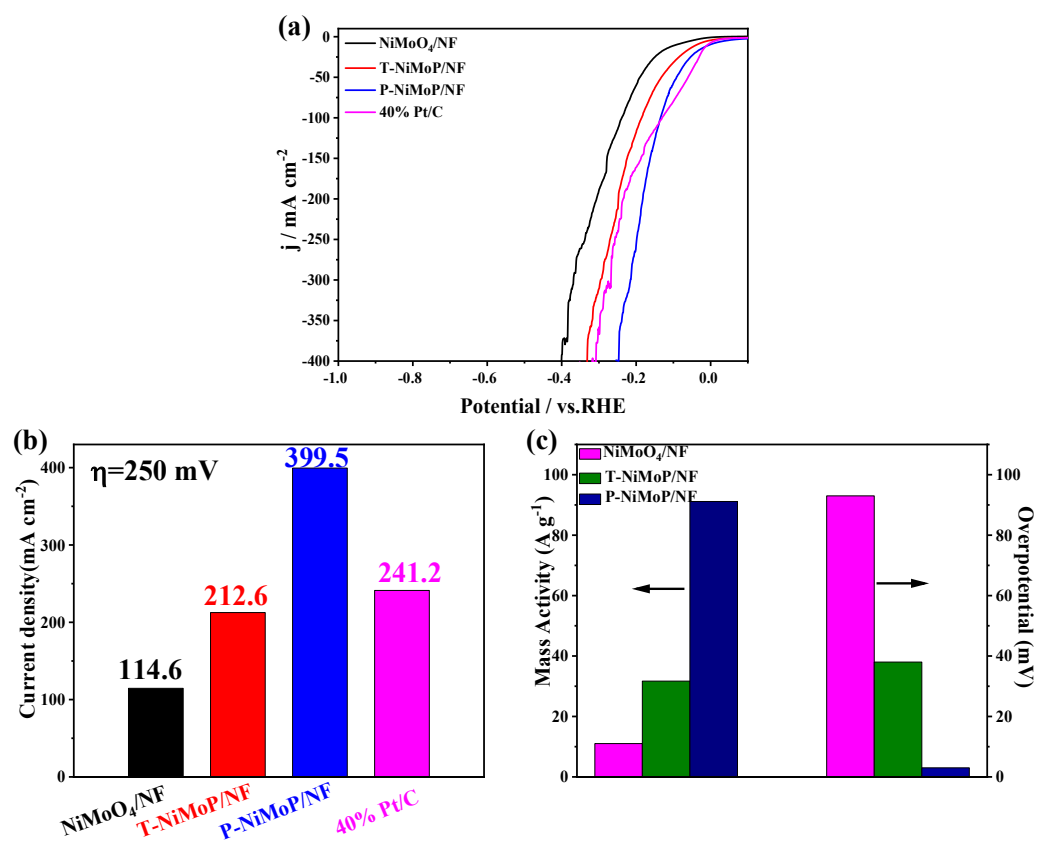

**Fig. S6** (a) Polarization curves at high current density. (b) Current density at the overpotential of 250 mV, (c) Comparison of mass activity at 100 mV and overpotential at 10 mA cm<sup>-2</sup> for NiMoO<sub>4</sub>/NF, T-NiMoP/NF and P-NiMoP/NF.

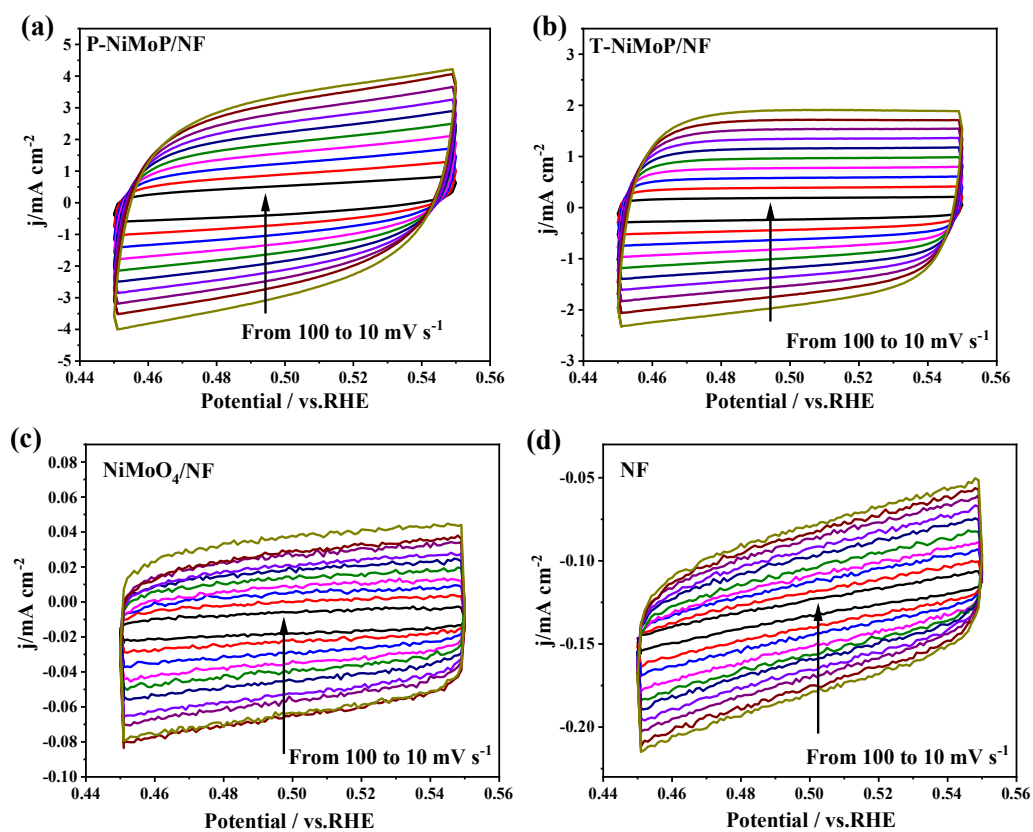

**Fig. S7** CVs of (a) P-NiMoP/NF, (b) T-NiMoP/NF, (c) NiMoO<sub>4</sub>/NF, and (d) NF electrodes at the potential regions of 0.45 and 0.55 V (vs. RHE) with scan rates of 10-100 mV s<sup>-1</sup> in 1.0 M KOH solution.

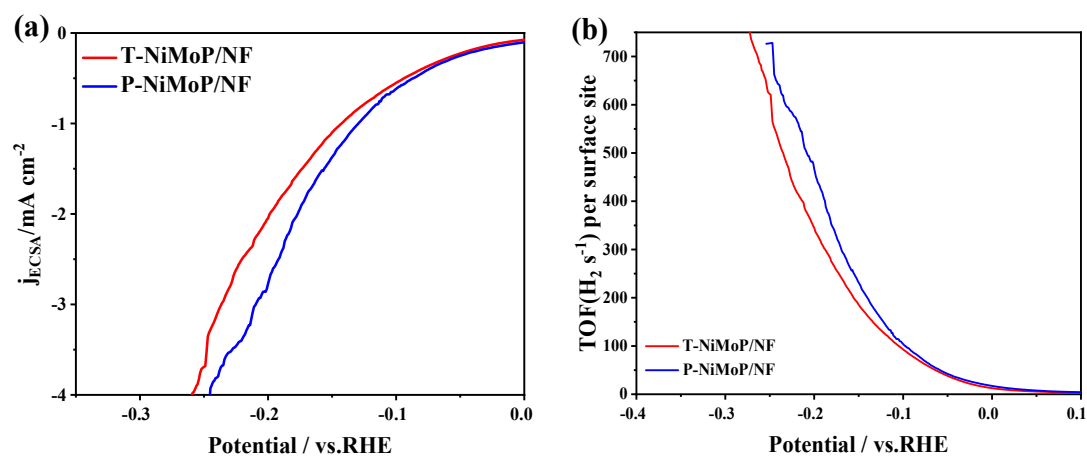

**Fig. S8** (a) ECSA normalized polarization curves. (b) Overpotential dependent TOFs.

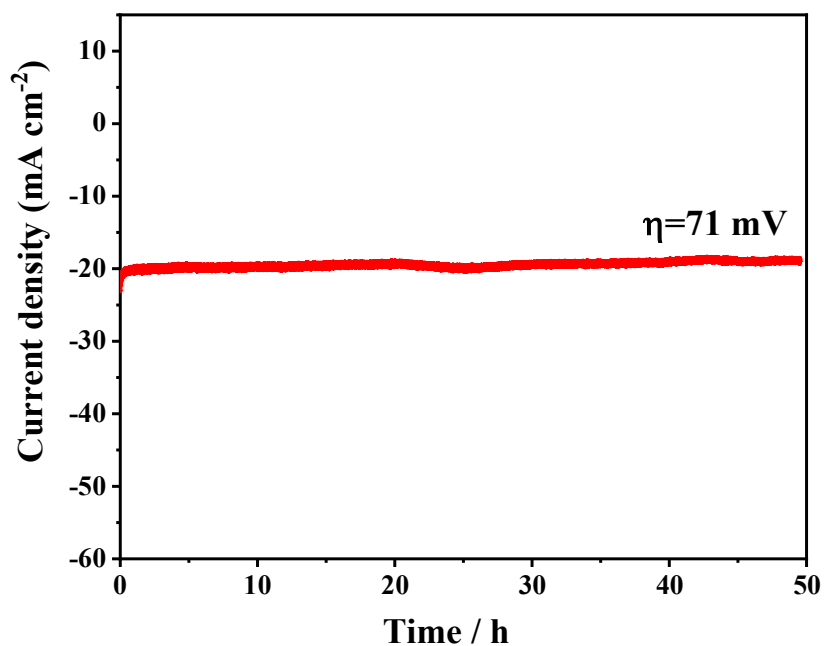

**Fig. S9** Current density during electrolysis for P-NiMoP/NF in 1.0 M KOH at  $\eta=71$  mV.

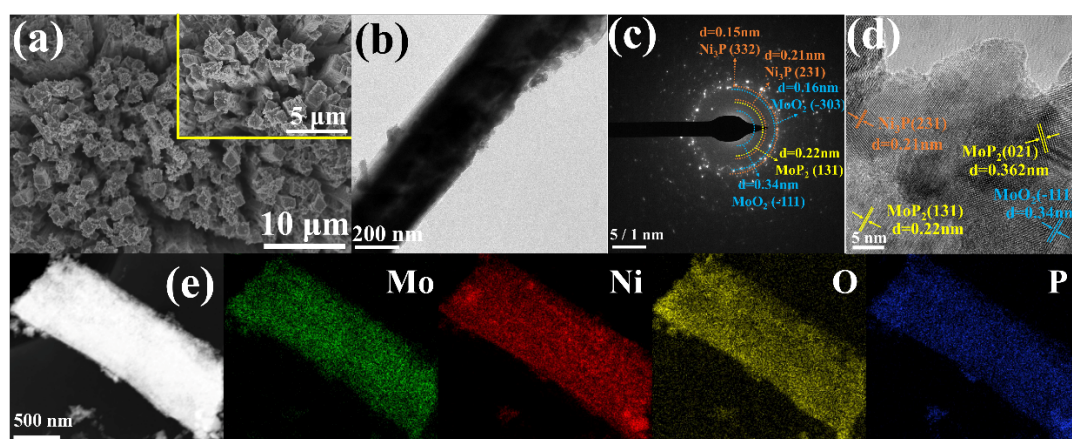

**Fig. S10** (a) SEM images, (b) TEM image, (c) SAED pattern, (d) HRTEM image and (e) EDX elemental mapping images of P-NiMoP after HER stability testing.

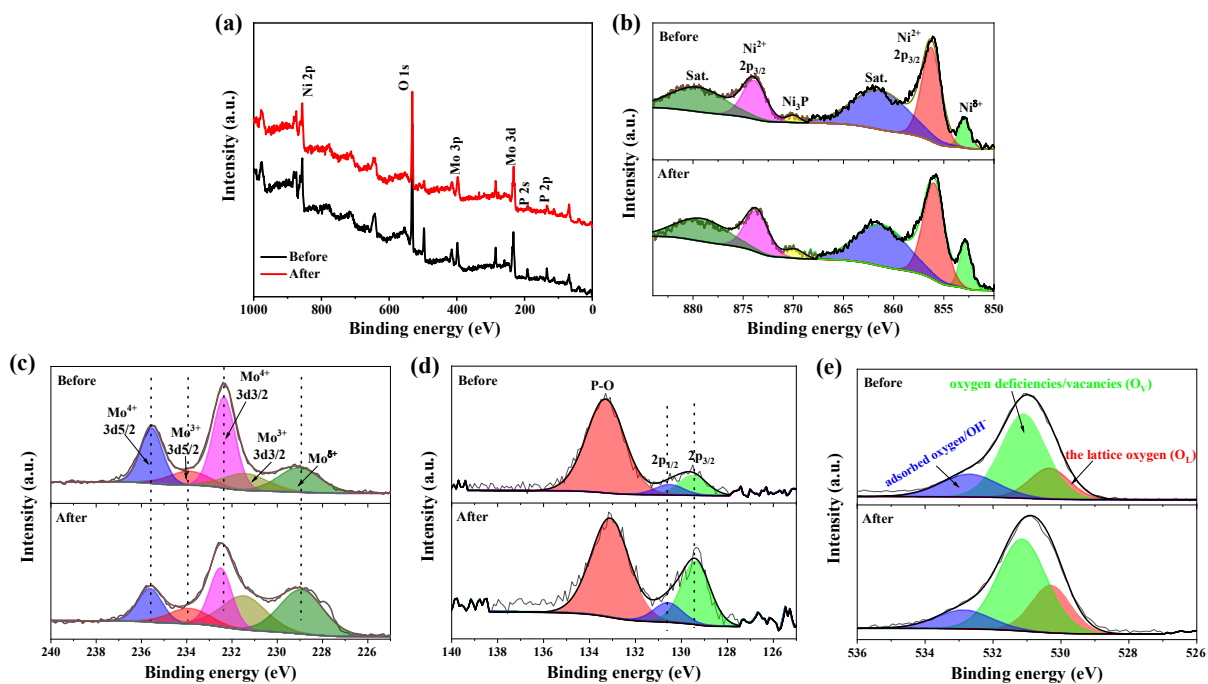

**Fig. S11** (a) XPS survey of P-NiMoP. High-resolution XPS spectra of (b) Mo 3d, (c) Ni 2p, (d) P 2p, (e) O 1s of P-NiMoP before and after stability testing.

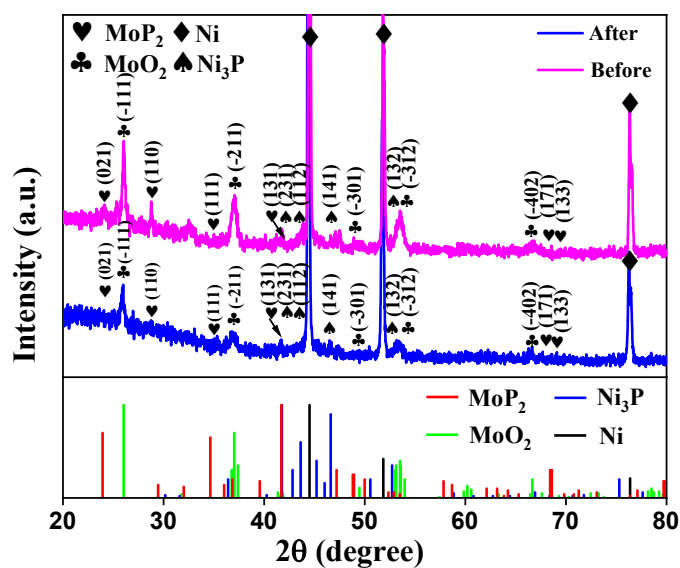

**Fig. S12** XRD patterns of P-NiMoP/NF before and after the stability test for 50 h at the overpotential of 71 mV vs. RHE.

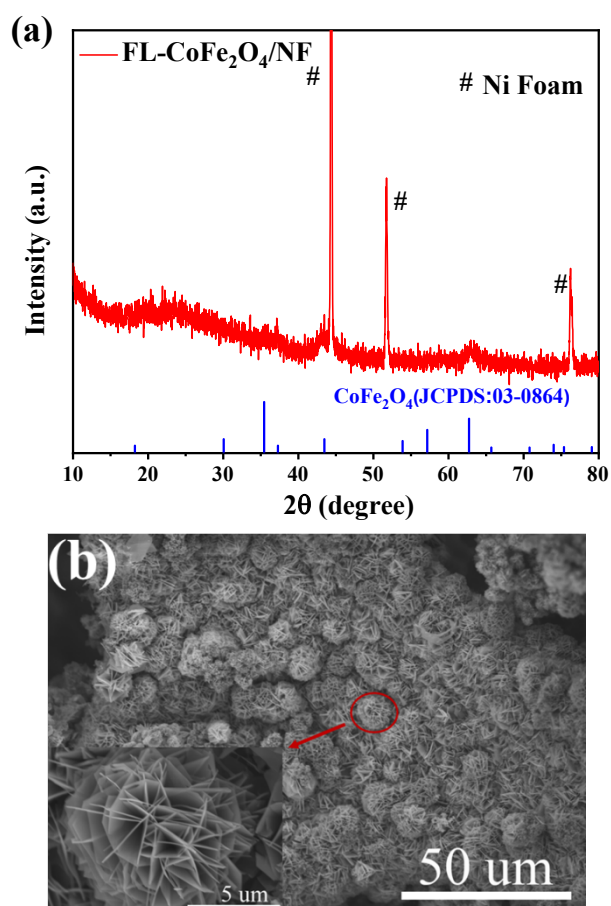

Fig. S13 (a) XRD pattern and (b) SEM images of FL-CoFe<sub>2</sub>O<sub>4</sub>/NF.

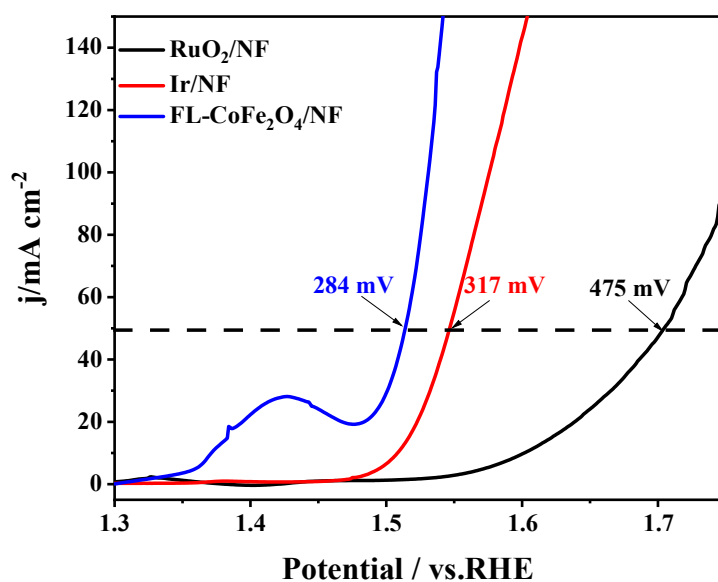

Fig. S14 LSV OER polarization curves of RuO<sub>2</sub>/NF, Ir/NF, and FL-CoFe<sub>2</sub>O<sub>4</sub>/NF in 1 M KOH.

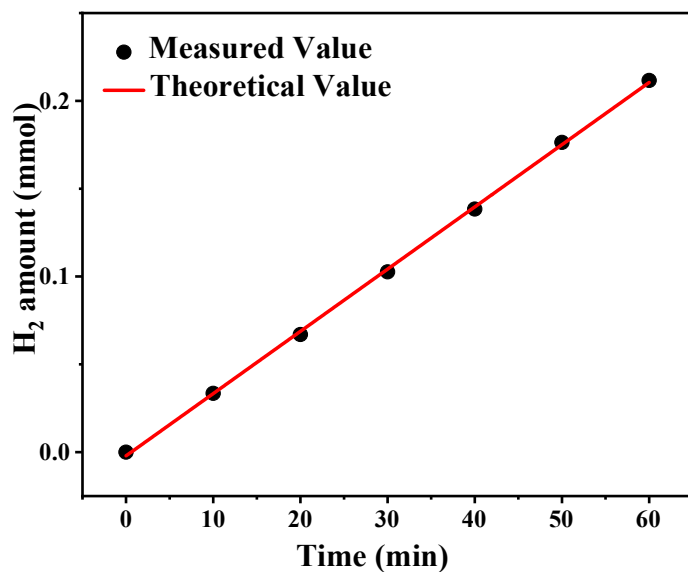

**Fig. S15** Amounts of  $H_2$  generated (the black dots) by FL- $CoFe_2O_4/NF(+)||P-NiMoP/NF(-)$  under the current density of  $10 \text{ mA cm}^{-2}$  in  $1.0 \text{ M KOH}$ . The straight line represents of the theoretical amount of  $H_2$  that can be generated with a Faradiac efficiency of 100%.

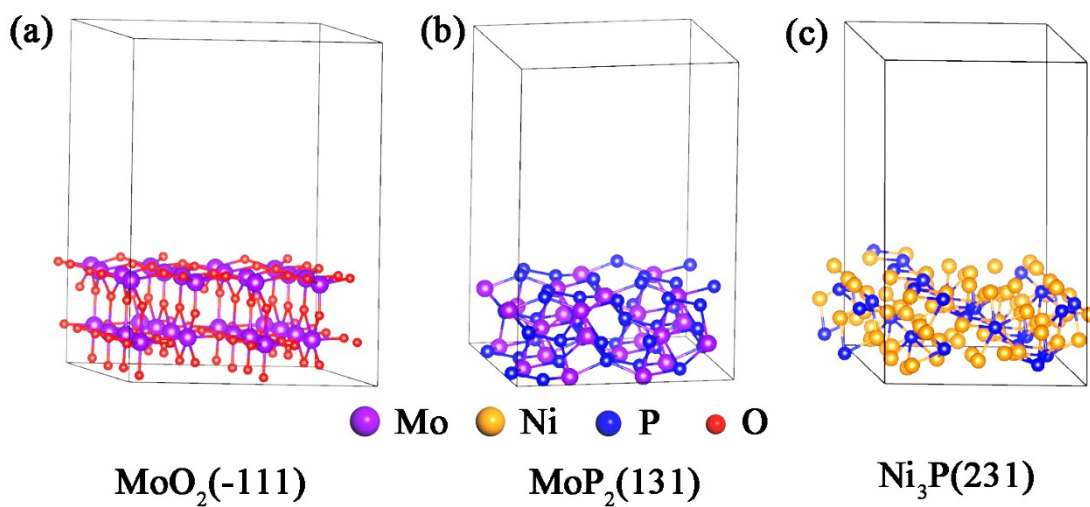

**Fig. S16** Structures of  $MoO_2(-111)$ ,  $MoP_2(131)$ , and  $Ni_3P(231)$  used for the DFT calculations.

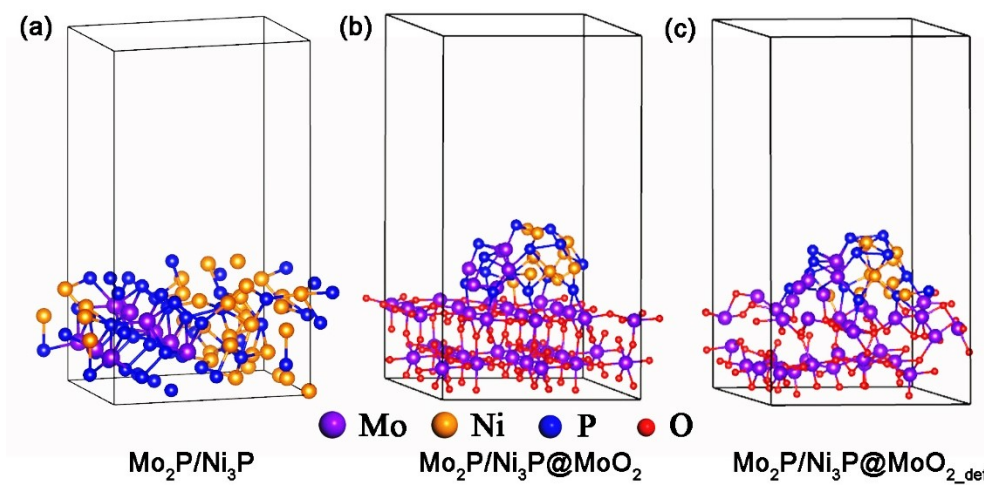

**Fig. S17** Heterostructures of  $\text{MoP}_2/\text{Ni}_3\text{P}$ ,  $\text{MoP}_2/\text{Ni}_3\text{P}@/\text{MoO}_2$  and  $\text{MoP}_2/\text{Ni}_3\text{P}@/\text{MoO}_{2\_def}$  used for the DFT calculations.



**Table S1.** Comparison of electrocatalytic HER activity of various nonprecious catalysts in different electrolyte.

| Catalysts                                                | Electrolytes | $\eta(\text{mV})@J(\text{mA cm}^{-2})$ | Tafel slope ( $\text{mV dec}^{-1}$ ) | $j_0/\mu\text{A cm}^{-2}$ | TOF( $\eta_{100}$ )( $\text{s}^{-1}$ ) | Stability(h) @ $\eta(\text{mV})$ | Stability(h) @ $j(\text{mA cm}^{-2})$ | Ref.      |
|----------------------------------------------------------|--------------|----------------------------------------|--------------------------------------|---------------------------|----------------------------------------|----------------------------------|---------------------------------------|-----------|
| P-NiMoP/NF                                               | 1.0M KOH     | 3@10<br>131@100<br>162@150             | 65.7                                 | 8560                      | 104.0                                  | 50@71                            | 12@10<br>12@100                       | This Work |
| P-CoMoO <sub>4</sub> /NF                                 | 1.0M KOH     | 94@10<br>197@100                       | 94                                   | NA                        | NA                                     | 48@150                           | NA                                    | 1         |
| P-doped $\beta\text{CoMoO}_4$                            | 1.0M KOH     | 138@10                                 | 68.8                                 | NA                        | NA                                     | 20@138                           | NA                                    | 2         |
| Co <sub>4</sub> NiP                                      | 1.0M KOH     | 129@10                                 | 52                                   | NA                        | NA                                     | 20@188<br>20@188                 | NA                                    | 3         |
| Co <sub>0.93</sub> Ni <sub>0.07</sub> P <sub>3</sub> /CC | 1.0M KOH     | 87@10                                  | 60.7                                 | NA                        | NA                                     | NA                               | 10@20                                 | 4         |
| Ni <sub>2(1-x)</sub> Mo <sub>2x</sub> P                  | 1.0M KOH     | 72@10<br>162@100                       | 46.4                                 | 537                       | 0.038                                  | 100@110                          | NA                                    | 5         |
| P-Mo-Ni(OH) <sub>2</sub>                                 | 1.0M KOH     | 22@10<br>98@100                        | 80                                   | NA                        | NA                                     | 100@100                          | NA                                    | 6         |
| N-NiCoP/NCF                                              | 1.0M KOH     | 78@10                                  | 83.2                                 | NA                        | $9.786 \times 10^{-3}$                 | NA                               | 100@10                                | 7         |
| NiFe LDH@NiCoP/NF                                        | 1.0M KOH     | 120@10                                 | 88.2                                 | NA                        | NA                                     | NA                               | 100@10                                | 8         |
| Ni <sub>2-x</sub> Cu <sub>x</sub> P/NF                   | 1.0M KOH     | 78@10<br>245@100                       | 70                                   | NA                        | NA                                     | NA                               | 30@10                                 | 9         |
| N-NiVFeP/NFF                                             | 1.0M KOH     | 79@10                                  | 78.6                                 | NA                        | NA                                     | NA                               | 100@10<br>100@100                     | 10        |
| NiMoN/CC                                                 | 1.0M KOH     | 109@10                                 | 95                                   | 920                       | NA                                     | NA                               | 12@10<br>12@30<br>12@50               | 11        |
| C-NiMoO <sub>4</sub> /CC                                 | 1.0M KOH     | 76@10                                  | 78                                   | NA                        | NA                                     | NA                               | 12@10<br>12@30<br>12@50               | 12        |
| Fe-CoP/Ti                                                | 1.0M KOH     | 78@10                                  | 75                                   | NA                        | NA                                     | 20@10                            | NA                                    | 13        |
| NiCoP/CC                                                 | 1.0M KOH     | 62@10                                  | 67                                   | NA                        | NA                                     | 15@20                            | NA                                    | 14        |
| Cu@NiFe LDH                                              | 1.0M KOH     | 116@10<br>192@100                      | 58.9                                 | NA                        | NA                                     | 48@162                           | 48@10<br>24@100                       | 15        |
| MoP/SN                                                   | 1.0M KOH     | 94@10<br>132@20                        | 59.7                                 | 480                       | NA                                     | NA                               | 20@10                                 | 16        |
| CoP/C                                                    | 1.0M KOH     | 163@10                                 | 101                                  | NA                        | NA                                     | 10@163                           | NA                                    | 17        |

NA: Not available

**Table S2.** Catalytic performance comparison of the catalysts.

| Catalysts              | HER                 |                                       |                                  |                                   | EASA<br>/ cm <sup>2</sup> | Charge<br>transfer<br>resistance<br>(R <sub>ct</sub> ) (Ω) |
|------------------------|---------------------|---------------------------------------|----------------------------------|-----------------------------------|---------------------------|------------------------------------------------------------|
|                        | $\eta_{10}$<br>/ mV | Tafel slope<br>/ mV dec <sup>-1</sup> | $j_0$<br>/ $\mu\text{A cm}^{-2}$ | $C_{dl}$<br>/ mF cm <sup>-2</sup> |                           |                                                            |
| NiMoO <sub>4</sub> /NF | 93                  | 148.2                                 | 2340                             | 1.49                              | 2.29                      | 19.06                                                      |
| T-NiMoP/NF             | 38                  | 139.1                                 | 6120                             | 37.45                             | 57.62                     | 10.21                                                      |
| NF                     | 115                 | 173                                   | NA                               | 0.65                              | 1                         | NA                                                         |
| P-NiMoP/NF             | 3                   | 65.7                                  | 8560                             | 60.21                             | 92.63                     | 4.17                                                       |
| Pt/C                   | 9                   | 57.7                                  | 7190                             | NA                                | NA                        | NA                                                         |

**Table S3.** The turnover frequency (TOF) of the T-NiMoP and P-NiMoP.

|                | $\eta=100$ mV         | $\eta=150$ mV         | $\eta=200$ mV         |
|----------------|-----------------------|-----------------------|-----------------------|
| <b>T-NiMoP</b> | 92.8 s <sup>-1</sup>  | 185.4 s <sup>-1</sup> | 345.4 s <sup>-1</sup> |
| <b>P-NiMoP</b> | 104.0 s <sup>-1</sup> | 231.4 s <sup>-1</sup> | 467.2 s <sup>-1</sup> |

**Table S4.** Comparison of the overall water splitting activity of the combination of P-NiMoP and FL-CoFe<sub>2</sub>O<sub>4</sub>/NF with other efficient hetero and bifunctional catalysts in 1 M alkaline electrolytes.

| Catalysts                                 | Electrolytes | Voltage (V) at the corresponding j (mA cm <sup>-2</sup> ) | References |
|-------------------------------------------|--------------|-----------------------------------------------------------|------------|
| <b>P-NiMoP/NF</b>                         | 1.0 M KOH    | 1.41@10<br>1.58@50<br>1.63@100                            | This Work  |
| <b>P-Mo-Ni(OH)<sub>2</sub></b>            | 1.0 M KOH    | 1.51@10<br>1.78@100                                       | 6          |
| <b>N-NiCoP/NCF</b>                        | 1.0 M KOH    | 1.56@10                                                   | 7          |
| <b>N-NiVFeP/NFF</b>                       | 1.0 M KOH    | 1.52@10                                                   | 10         |
| <b>Cu@NiFe LDH</b>                        | 1.0 M KOH    | 1.54@10<br>1.69@100                                       | 15         |
| <b>F<sub>0.25</sub>C<sub>1</sub>CH/NF</b> | 1.0 M KOH    | 1.45@10<br>1.49@100                                       | 18         |
| <b>Cu@CoS<sub>x</sub>/CF</b>              | 1.0 M KOH    | 1.50@10<br>1.80@100                                       | 19         |
| <b>NiMoP<sub>2</sub></b>                  | 1.0 M KOH    | 1.60@10<br>1.94@50                                        | 20         |
| <b>NiSe/NF</b>                            | 1.0 M KOH    | 1.63@10<br>1.74@20                                        | 21         |
| <b>FeCoNi-HNTAs</b>                       | 1.0 M KOH    | 1.429@10<br>1.61@50<br>1.73@100                           | 22         |

## References

1. S. Zhao, J. Berry-Gair, W. Li, G. Guan, M. Yang, J. Li, F. Lai, F. Corà, K. Holt, D. J. L. Brett, G. He and I. P. Parkin, *Adv. Sci.*, 2020, **7**, 1903674.
2. S. Li, N. Yang, L. Liao, Y. Luo, S. Wang, F. Cao, W. Zhou, D. Huang and H. Chen, *ACS Appl. Mater. Interfaces*, 2018, **10**, 37038-37045.
3. L. Yan, L. Cao, P. Dai, X. Gu, D. Liu, L. Li, Y. Wang and X. Zhao, *Adv. Funct. Mater.*, 2017, **27**, 1703455.
4. Q. Fu, T. Wu, G. Fu, T. Gao, J. Han, T. Yao, Y. Zhang, W. Zhong, X. Wang and B. Song, *ACS Energy Lett.*, 2018, **3**, 1744-1752.
5. L. Yu, I. K. Mishra, Y. Xie, H. Zhou, J. Sun, J. Zhou, Y. Ni, D. Luo, F. Yu, Y. Yu, S. Chen and Z. Ren, *Nano Energy*, 2018, **53**, 492-500.
6. W. Zhang, Y. Tang, L. Yu and X.-Y. Yu, *Appl. Catal. B-Environ.*, 2020, **260**, 118154.
7. R. Zhang, J. Huang, G. Chen, W. Chen, C. Song, C. Li and K. Ostrikov, *Appl. Catal. B-Environ.*, 2019, **254**, 414-423.
8. H. Zhang, X. Li, A. Hähnel, V. Naumann, C. Lin, S. Azimi, S. L. Schweizer, A. W. Maijenburg and R. B. Wehrspohn, *Adv. Funct. Mater.*, 2018, **28**, 1706847.
9. S. Chu, W. Chen, G. Chen, J. Huang, R. Zhang, C. Song, X. Wang, C. Li and K. Ostrikov, *Appl. Catal. B-Environ.*, 2019, **243**, 537-545.
10. H. Fan, W. Chen, G. Chen, J. Huang, C. Song, Y. Du, C. Li and K. Ostrikov, *Appl. Catal. B-Environ.*, 2020, **268**, 118440.
11. Y. Zhang, B. Ouyang, J. Xu, S. Chen, R. S. Rawat and H. J. Fan, *Adv. Energy Mater.*, 2016, **6**, 1600221.
12. Y. Zhang, B. Ouyang, K. Xu, X. Xia, Z. Zhang, R. S. Rawat and H. J. Fan, *Small*, 2018, **14**, 1800340.
13. C. Tang, R. Zhang, W. Lu, L. He, X. Jiang, A. M. Asiri and X. Sun, *Adv. Mater.*, 2017, **29**, 1602441.
14. C. Du, L. Yang, F. Yang, G. Cheng and W. Luo, *ACS Catal.*, 2017, **7**, 4131-4137.
15. L. Yu, H. Zhou, J. Sun, F. Qin, F. Yu, J. Bao, Y. Yu, S. Chen and Z. Ren, *Energy Environ. Sci.*, 2017, **10**, 1820-1827.
16. M. A. R. Anjum and J. S. Lee, *ACS Catal.*, 2017, **7**, 3030-3038.
17. B. Luo, T. Huang, Y. Zhu and D. Wang, *J. Energy Chem.*, 2017, **26**, 1147-1152.
18. L. Hui, Y. Xue, D. Jia, H. Yu, C. Zhang and Y. Li, *Adv. Energy Mater.*, 2018, **8**, 1800175.
19. Y. Liu, Q. Li, R. Si, G.-D. Li, W. Li, D.-P. Liu, D. Wang, L. Sun, Y. Zhang and X. Zou,

*Adv. Mater.*, 2017, **29**, 1606200.

20. X.-D. Wang, H.-Y. Chen, Y.-F. Xu, J.-F. Liao, B.-X. Chen, H.-S. Rao, D.-B. Kuang and C.-Y. Su, *J. Mater. Chem. A*, 2017, **5**, 7191-7199.
21. C. Tang, N. Cheng, Z. Pu, W. Xing and X. Sun, *Angew. Chem. Int. Ed.*, 2015, **54**, 9351-9355.
22. H. Li, S. Chen, Y. Zhang, Q. Zhang, X. Jia, Q. Zhang, L. Gu, X. Sun, L. Song and X. Wang, *Nat. Commun.*, 2018, **9**, 2452.
